# Supplementary material
Source: PubMed Central journal article supplement (PMC2729979)
Supplement: 425_2009_988_MOESM1_ESM.pdf [file 425_2009_988_MOESM1_ESM.pdf]

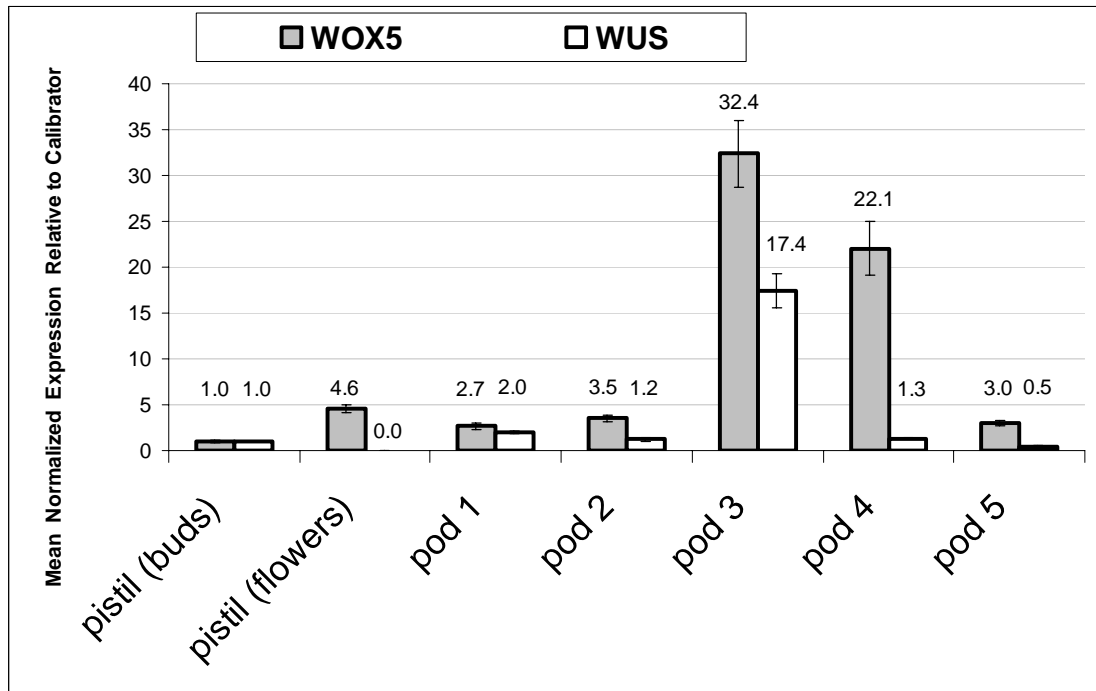

**Supplementary Fig. 1** Quantitative RT-PCR of *MtWUS* and *MtWOX5* at different stages of pod development in *M. truncatula* cv. Jemalong. Expression is maximal at the globular-torpedo stages of embryogenesis (pod 3) when apices are active and decreases later on as the embryo is formed and there is some further development of the radicle and extensive cotyledon growth (Nolan et al. 2009). The numbers associated with each point refer to expression relative to the calibrator set at 1.0. Values are SE (n=3)
